# Supplementary material
Source: publisher figshare collection journal article supplement (https://tandf.figshare.com/ndownloader/files/22741988)
Supplement: Supplementary file 1 [file 22741988]

**Pd2dba3/P(t-Bu)3H.BF4/Cy2NMecatalyzed Heck coupling in synthesis of 3-alkenyl-*1H*-isochromen-1-ones**

**Changalaraya Dasaradhan, Fazlur-Rahman Nawaz Khan***

Organic and Medicinal Chemistry Research Laboratory, Organic Chemistry Division, School of Advanced Sciences, Vellore Institute of Technology, Vellore 632 014, Tamil Nadu, India.

E-mail: nawaz_f@yahoo.co.in

**1H and 13C NMR spectrum of Methyl (*E*)-3-(1-oxo-1*H*-isochromen-3-yl)acrylate**


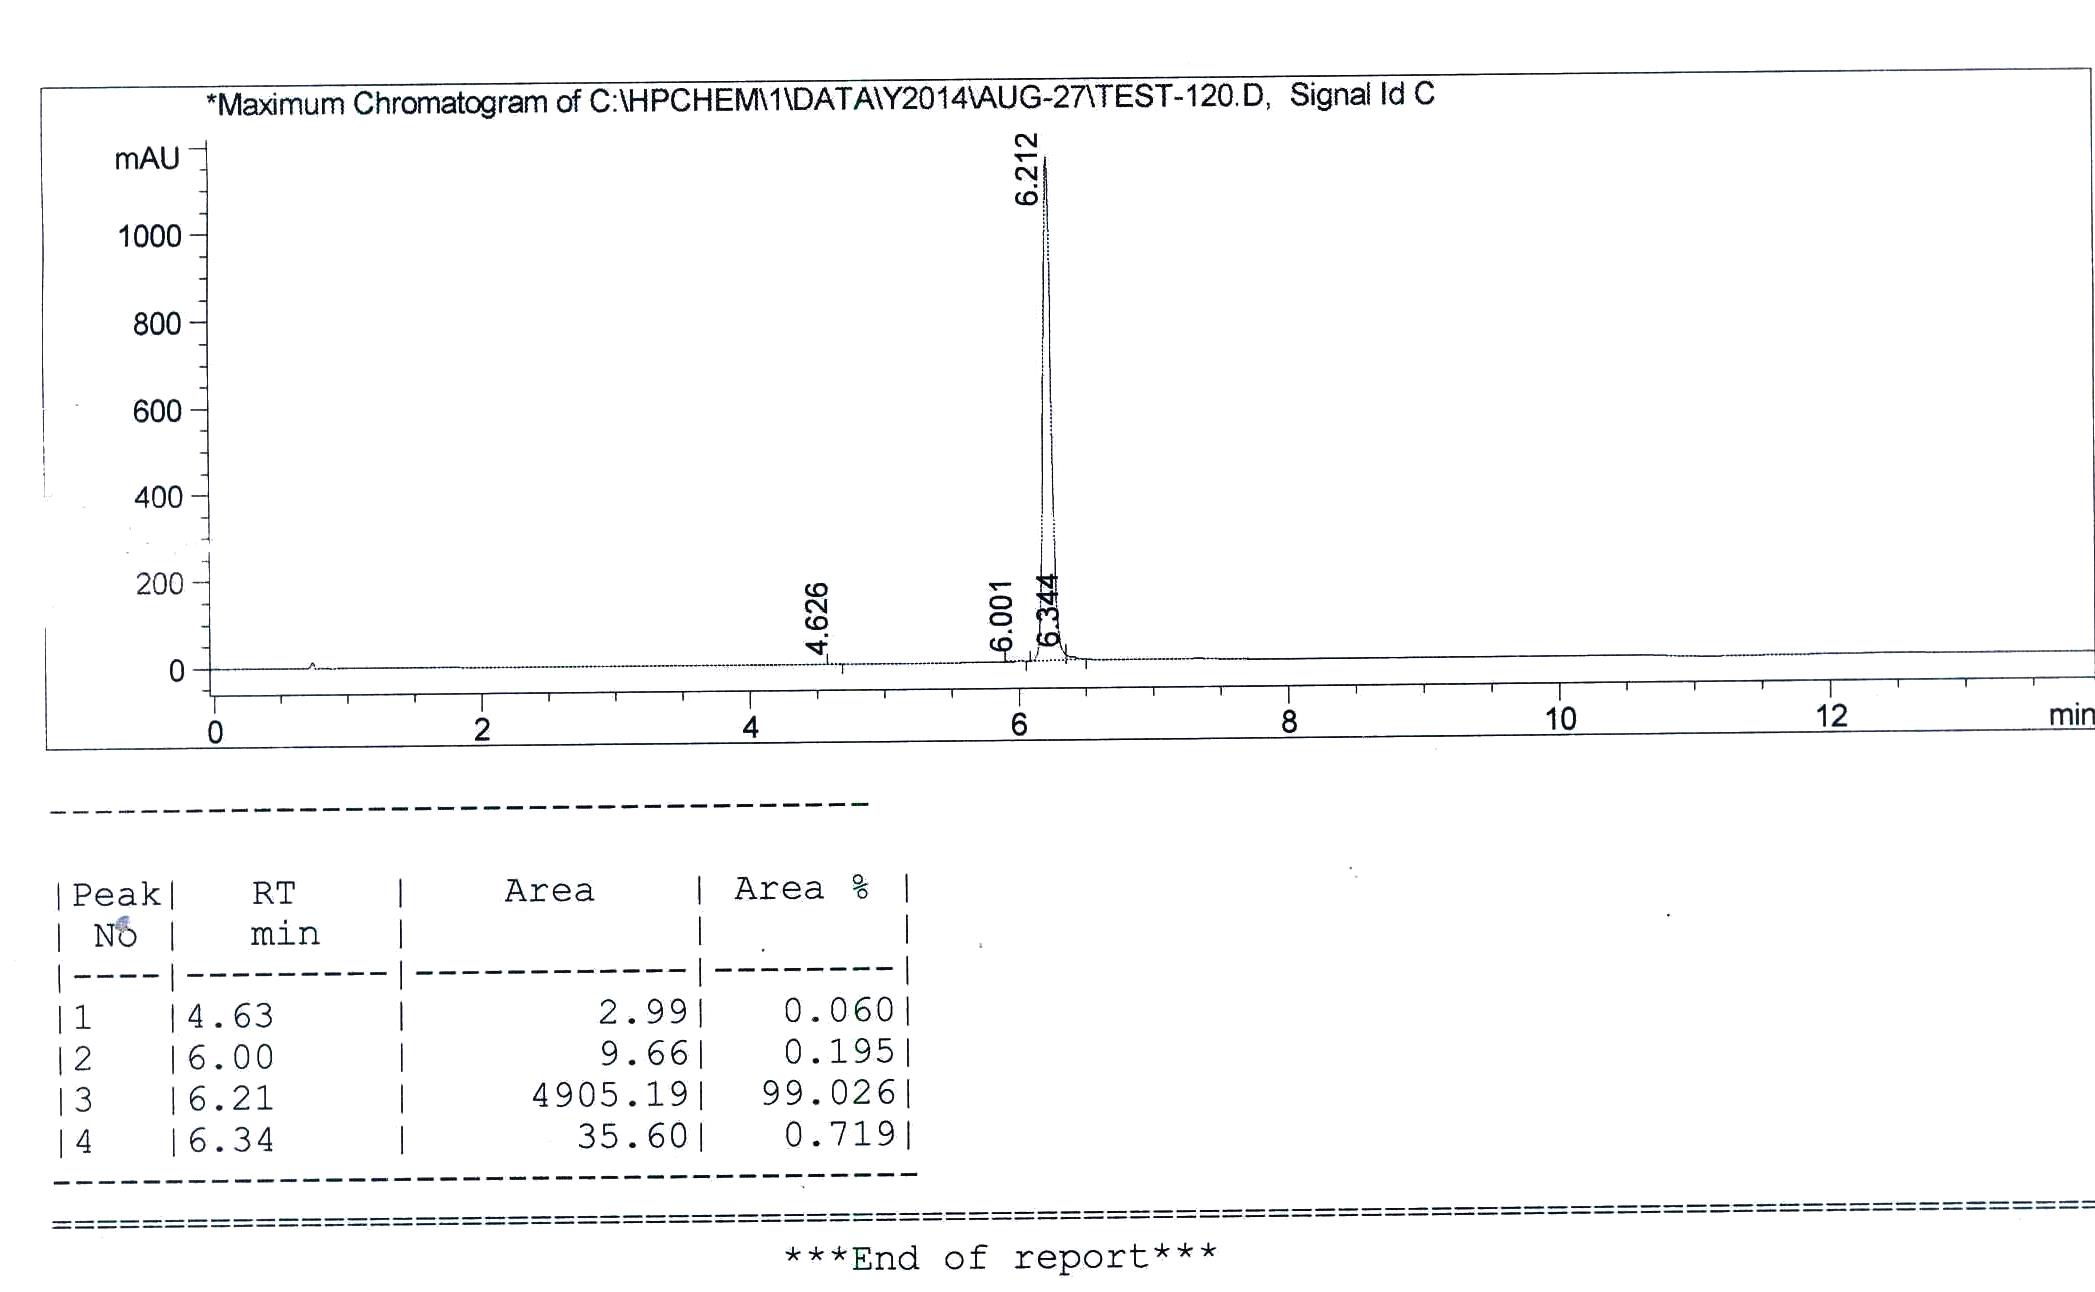


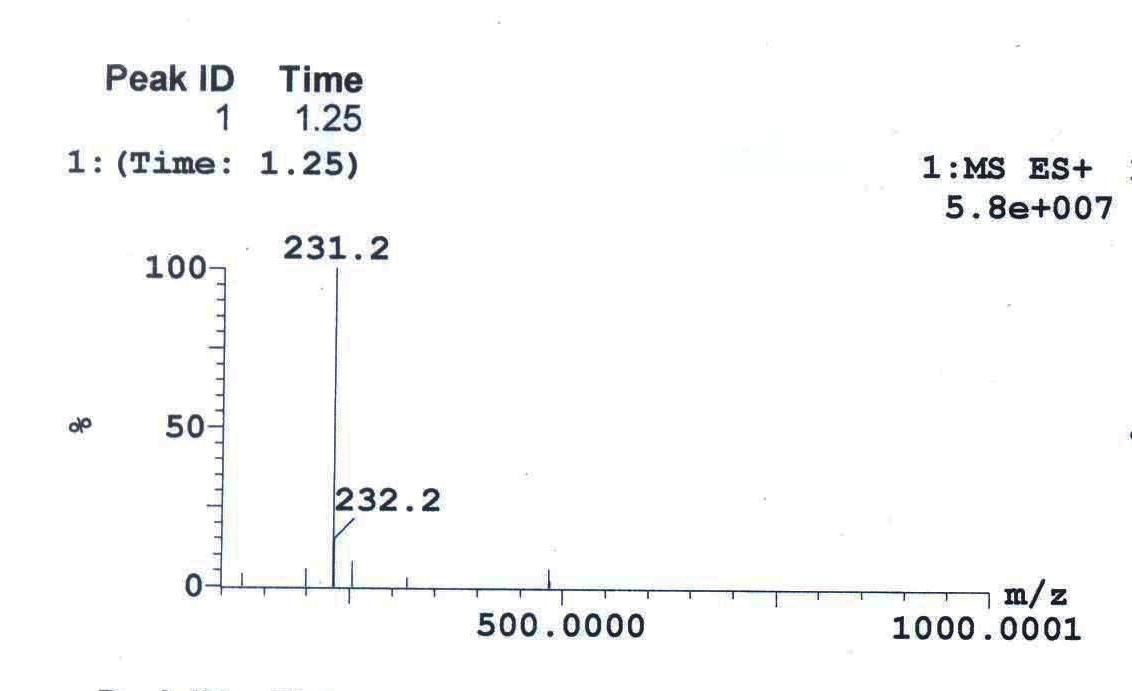


**UPLC- Mass spectrum of Methyl (*E*)-3-(1-oxo-1*H*-isochromen-3-yl)acrylate**

**DEPT and 2D NMR of Methyl (*E*)-3-(1-oxo-1*H*-isochromen-3-yl)acrylate**


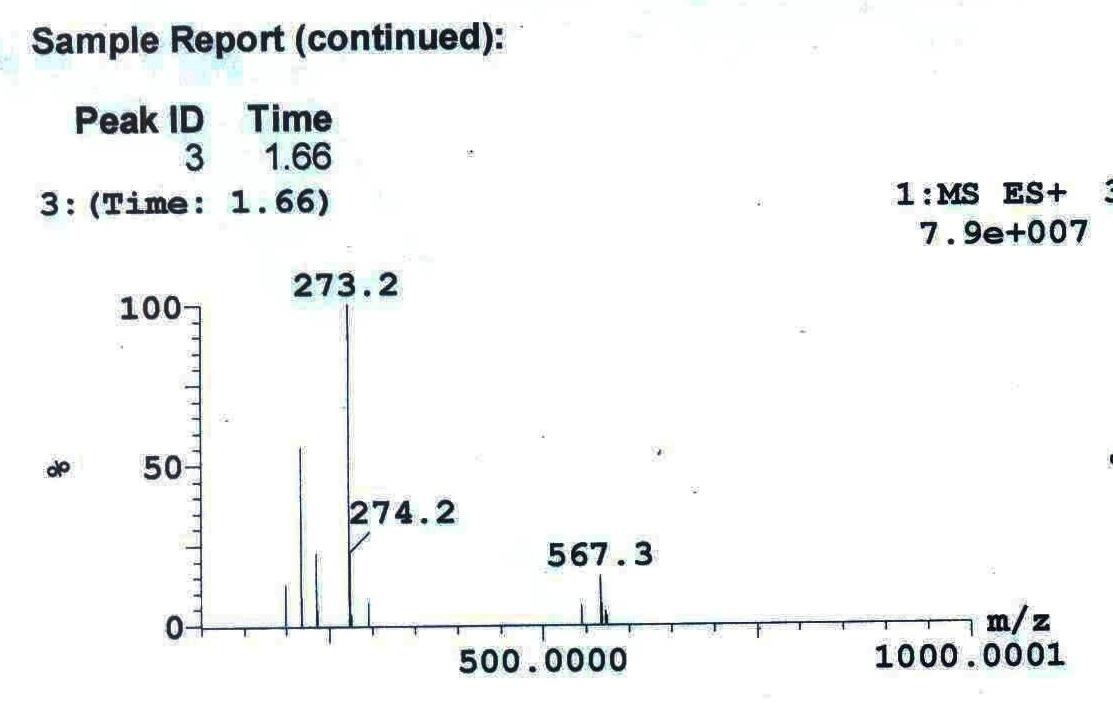


**1H, 13C NMR and UPLC-MS of Butyl (*E*)-3-(1-oxo-1*H*-isochromen-3-yl)acrylate**

**1H, 13C NMR and UPLC-MS of (*E*)-3-(2-(pyridin-2-yl)vinyl)-1*H*-isochromen-1-one**


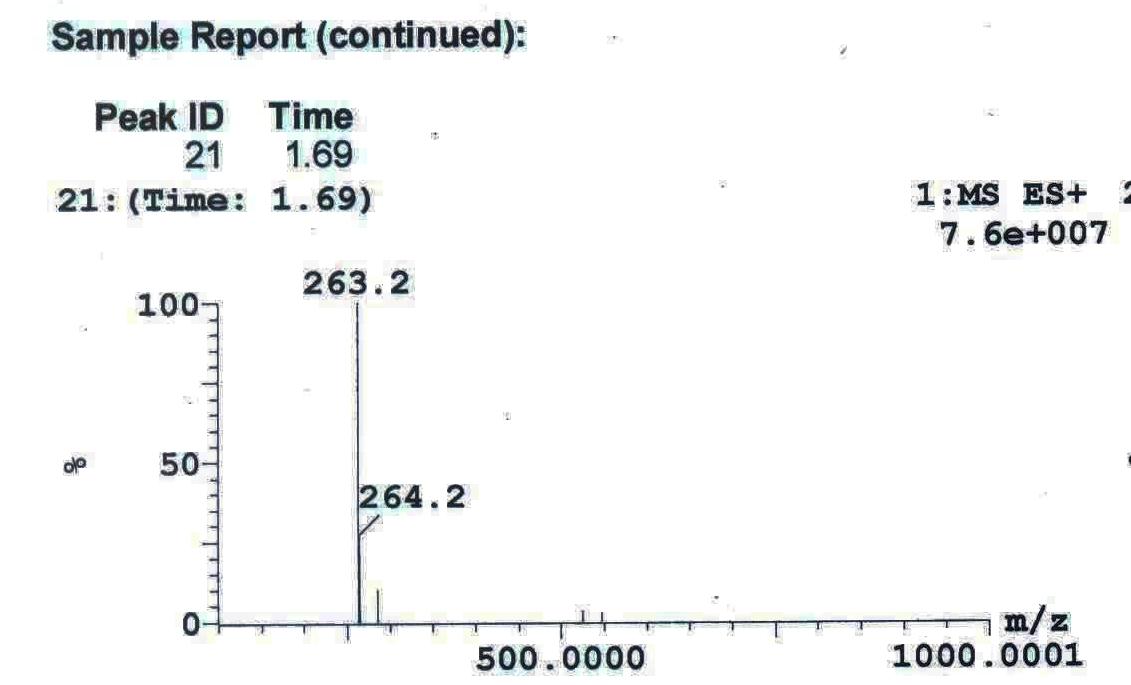


**1H, 13C NMR and UPLC-MS of (*E*)-3-(3-phenylprop-1-en-1-yl)-1*H*-isochromen-1-one**

**
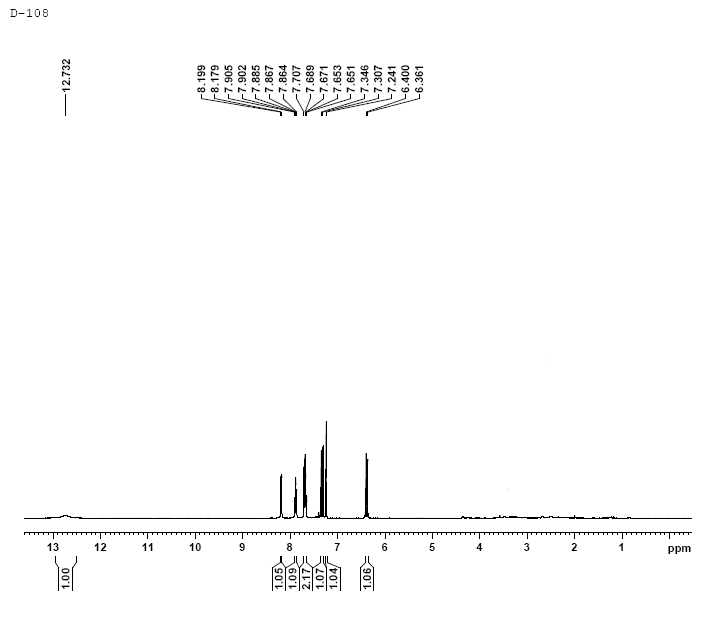
**

**
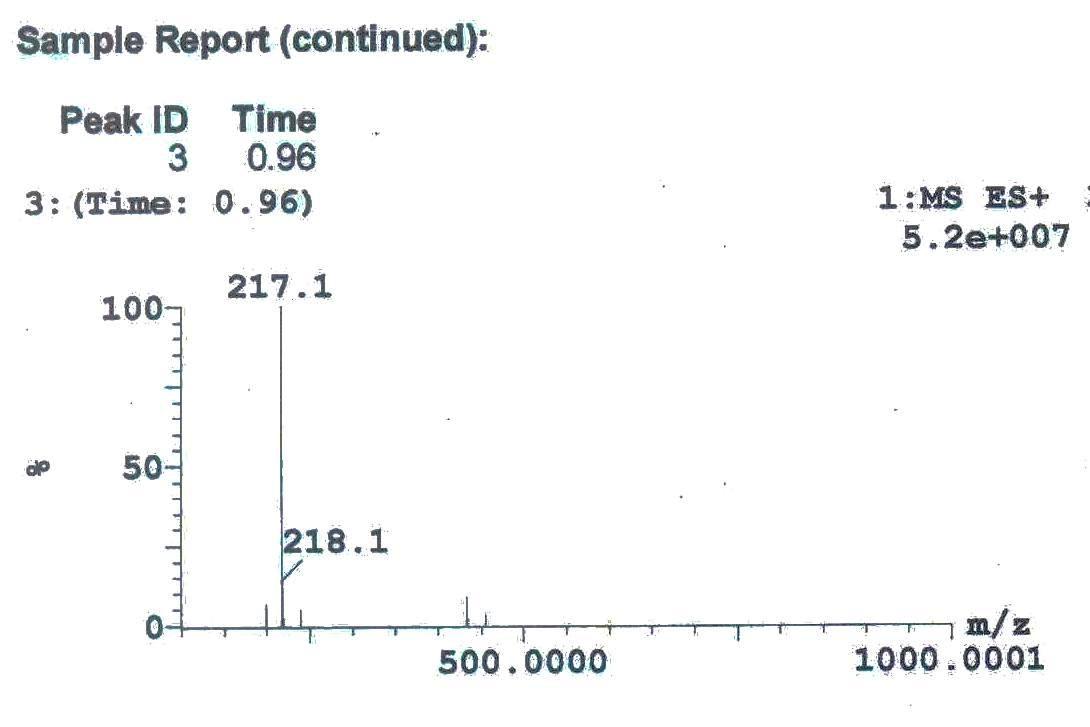
**

**1H, 13C NMR and UPLC-MS of (*E*)-3-(1-oxo-1*H*-isochromen-3-yl)acrylic acid**


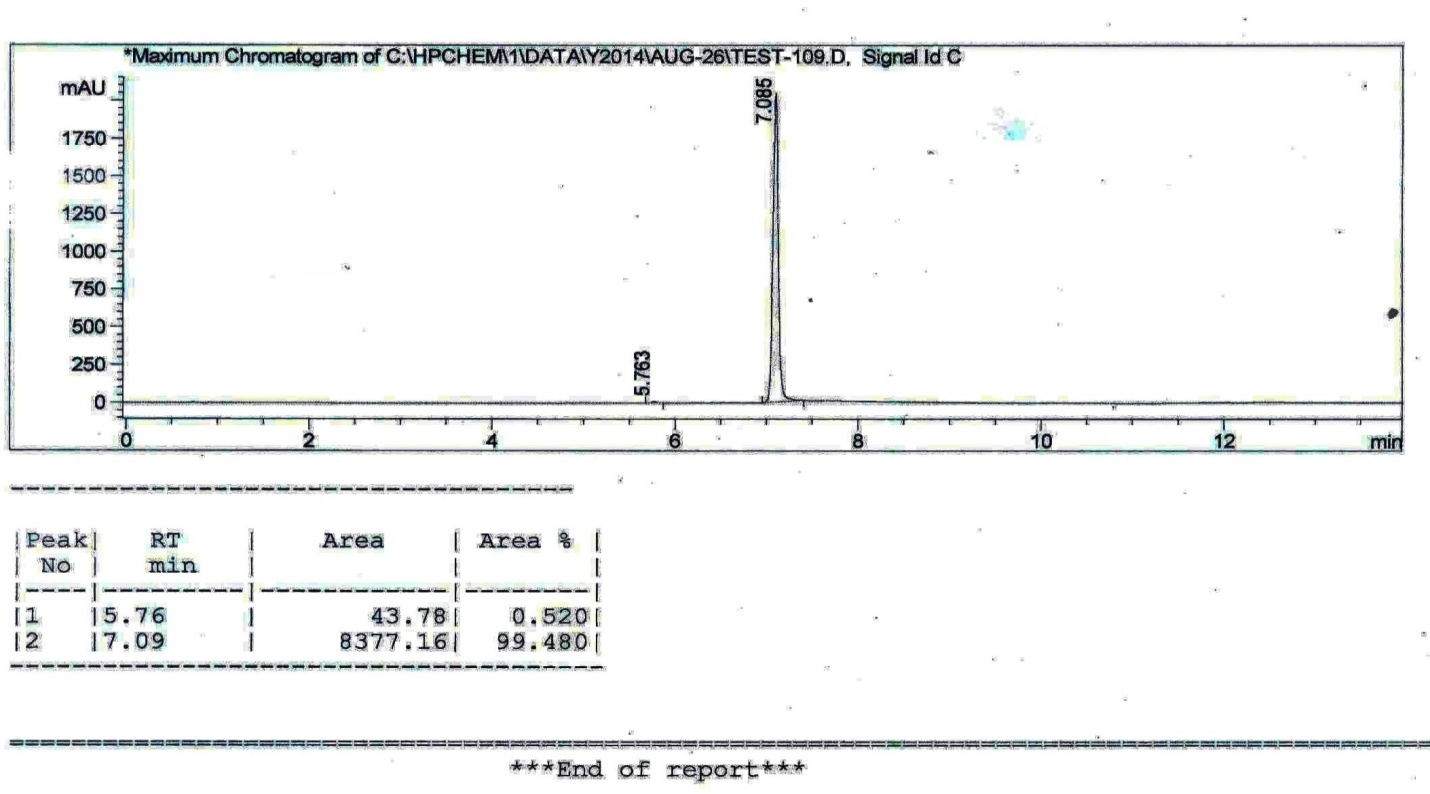


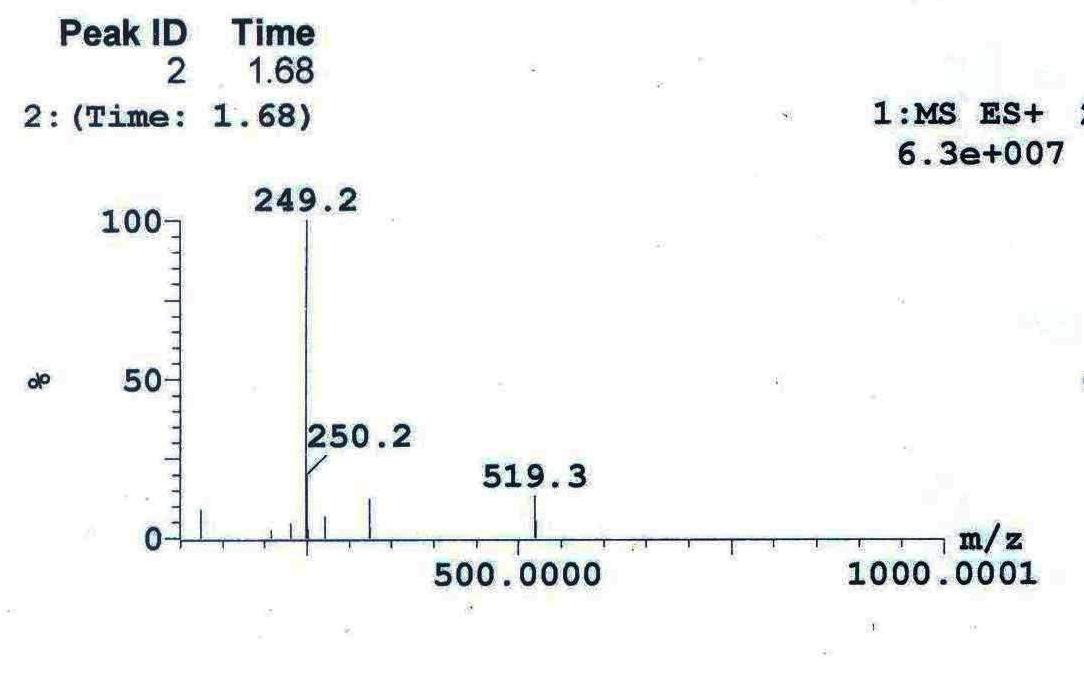


**1H, 13C NMR and UPLC-MS of (*E*)-3-styryl-1*H*-isochromen-1-one**

Cosy

**1H-1H COSY and DEPT of (*E*)-3-styryl-1*H*-isochromen-1-one**


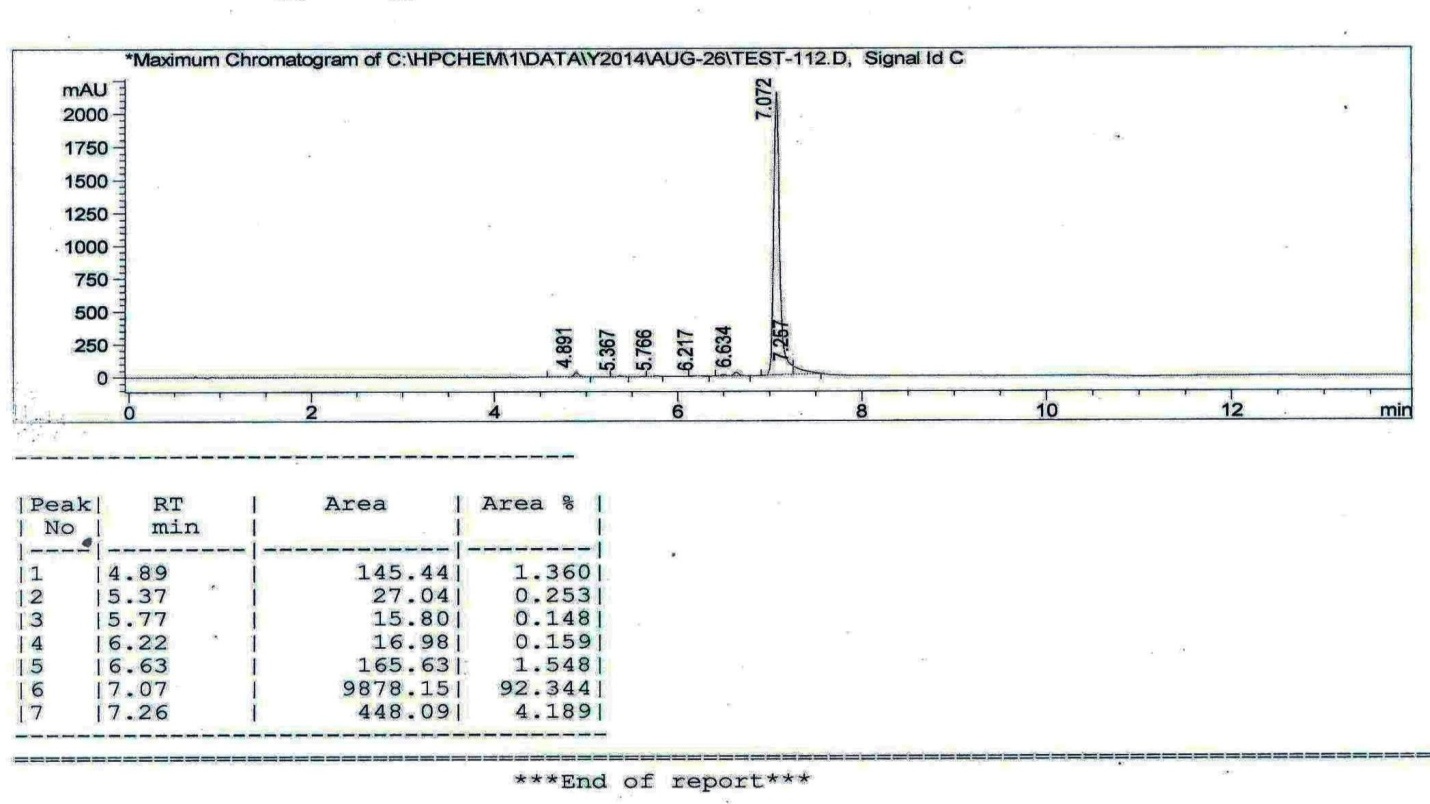


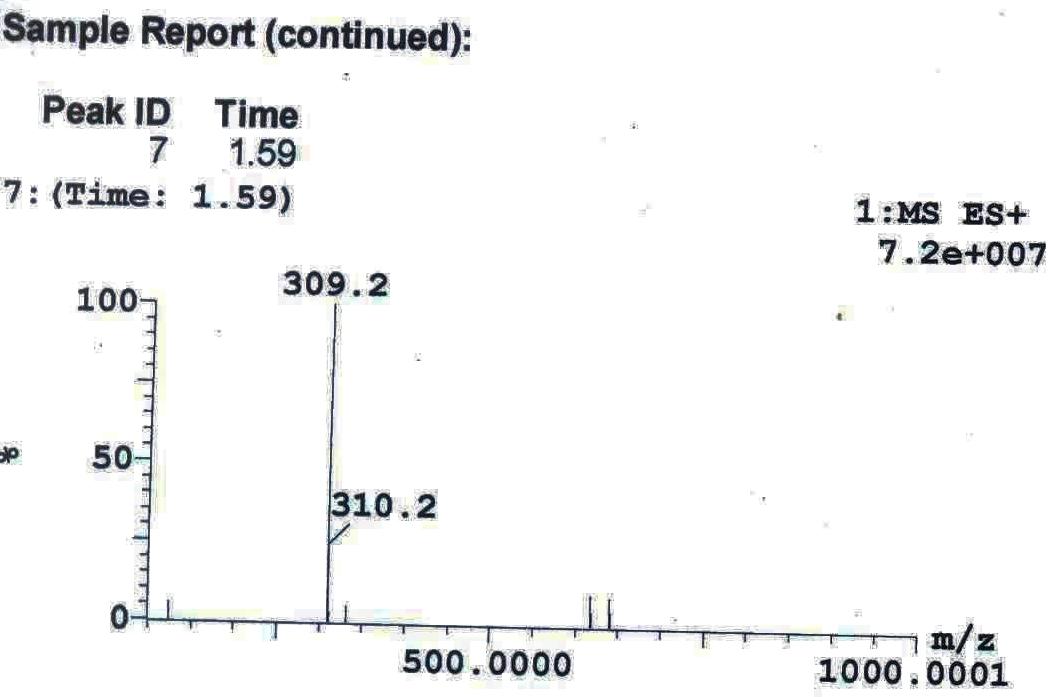


**1H, 13C NMR and UPLC-MS of (*E*)-6,7-dimethoxy-3-styryl-1*H*-isochromen-1-one**

**1H- 1H COSY, DEPT and HSQC of (*E*)-6,7-dimethoxy-3-styryl-1*H*-isochromen-1-one**


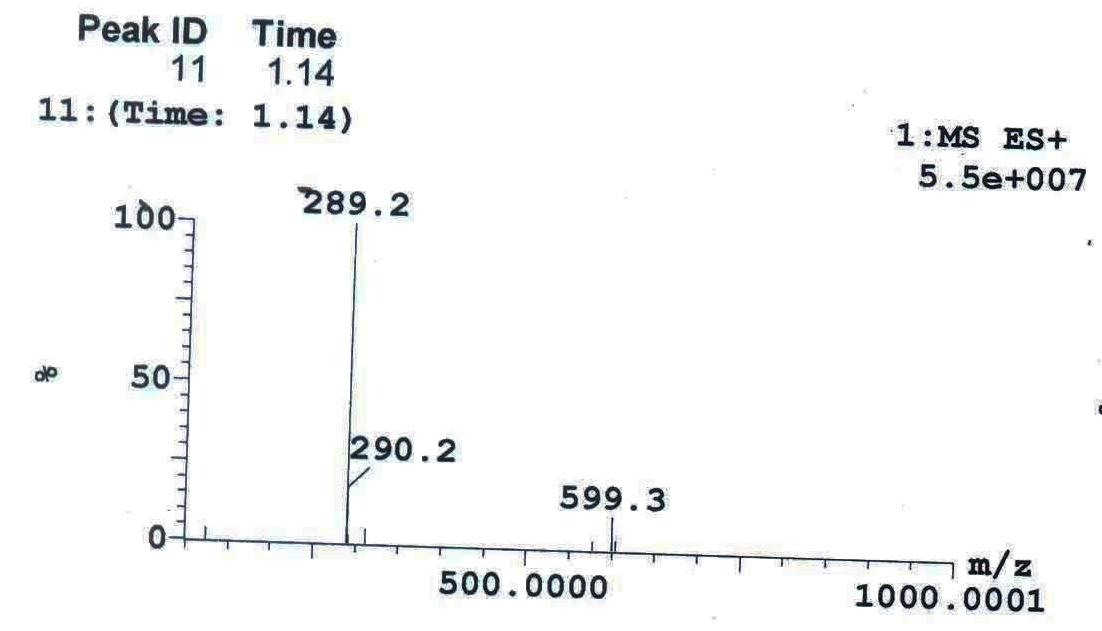


**1H, 13C NMR and UPLC-MS of 3-(3,6-dihydro-2H-pyran-4-yl)-6,7-dimethoxy-1*H*-isochromen-1-one**


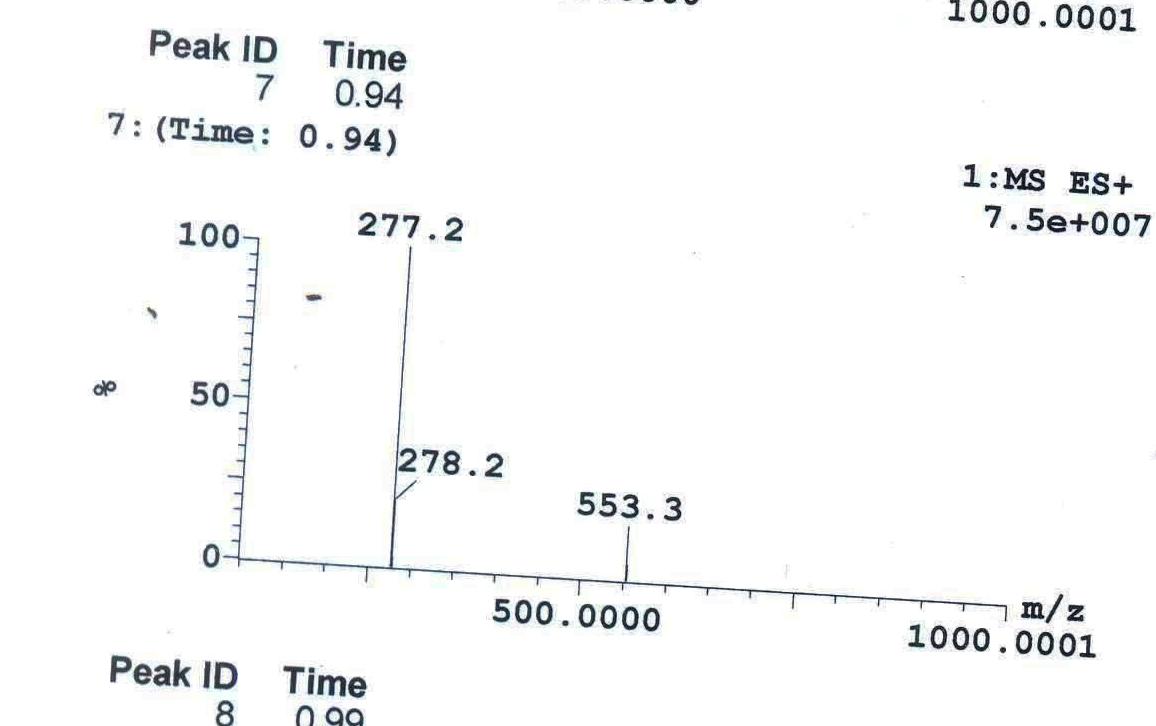


**1H, 13C NMR and UPLC-MS of (*E*)-3-(6,7-dimethoxy-1-oxo-1*H*-isochromen-3-yl)acrylic acid**


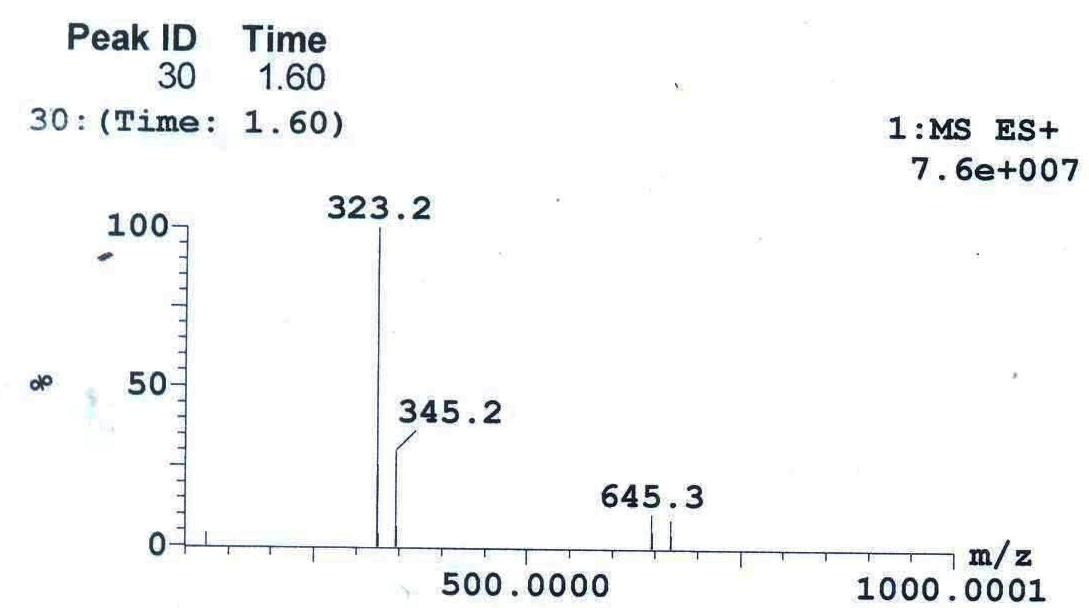


**1H, 13C NMR and UPLC-MS of (*E*)-6,7-dimethoxy-3-(3-phenylprop-1-en-1-yl)-1*H*-isochromen-1-one**


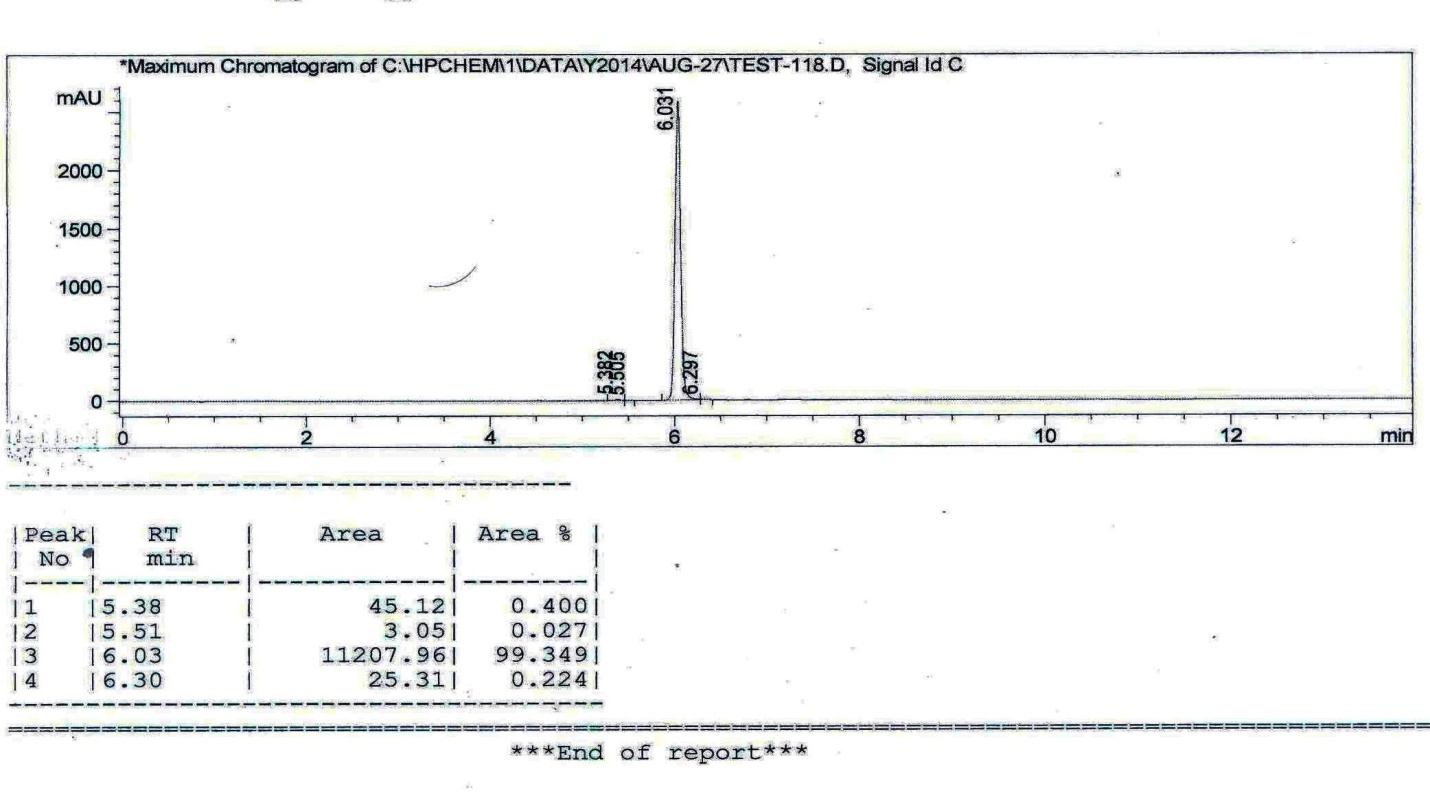


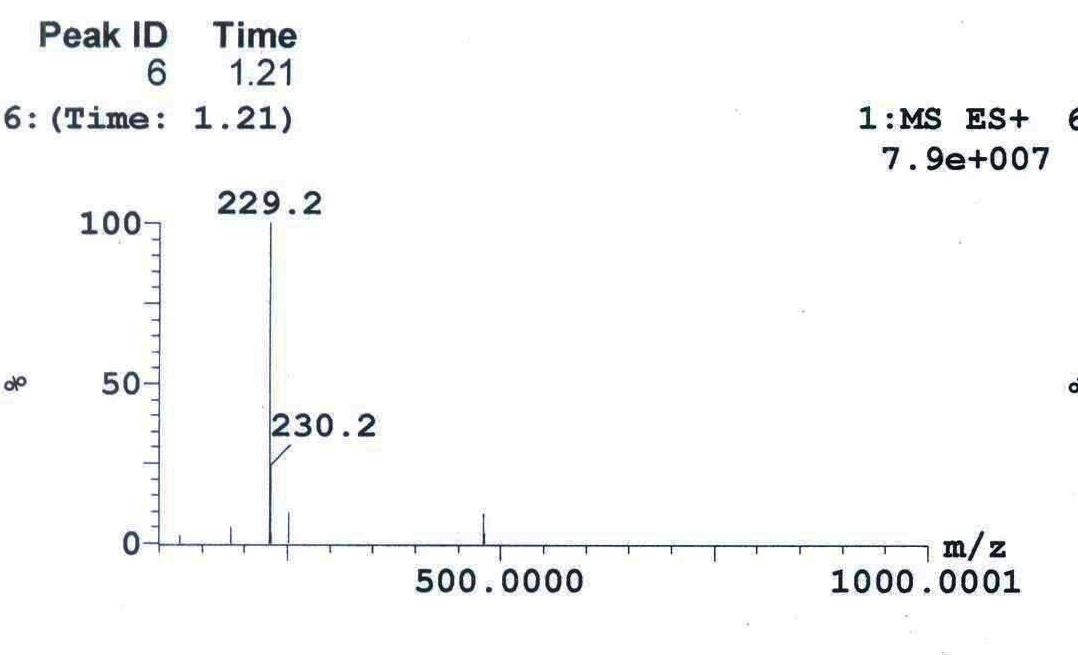


**1H, 13C NMR and UPLC-MS of 3-(3,6-dihydro-2H-pyran-4-yl)-1*H*-isochromen-1-one**

**2D NMR and DEPT of 3-(3,6-dihydro-2H-pyran-4-yl)-1*H*-isochromen-1-one**

**
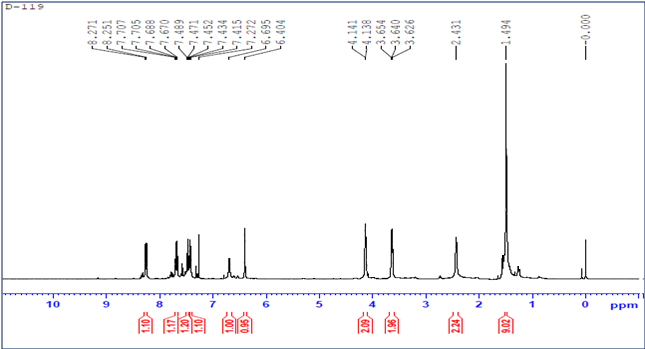
**

(Boc cleaved mass)
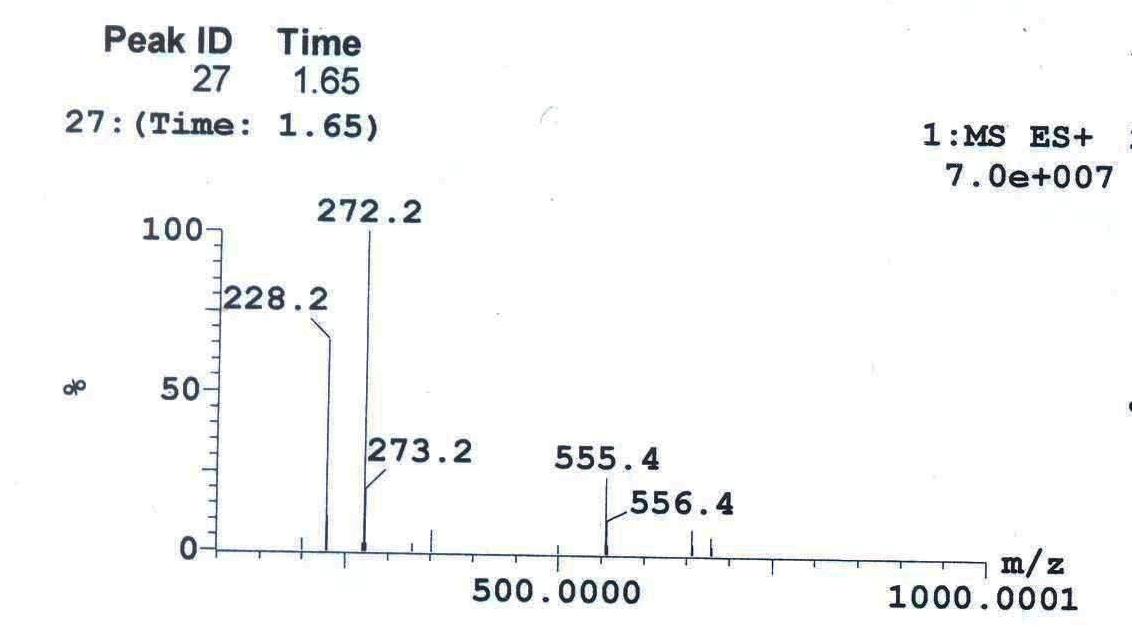


**1H, 13C NMR and UPLC-MS of tert-butyl 5-(1-oxo-1*H*-isochromen-3-yl)-3,6-dihydropyridine-1(2*H*)-carboxylate**


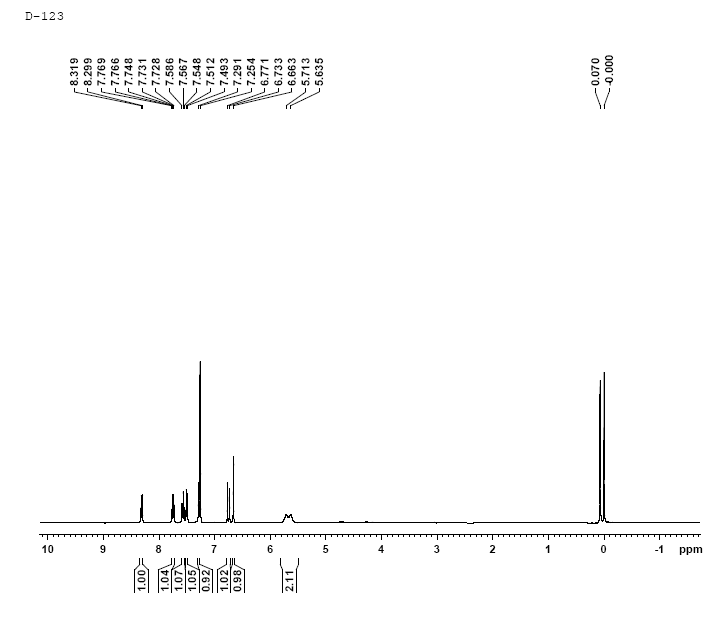


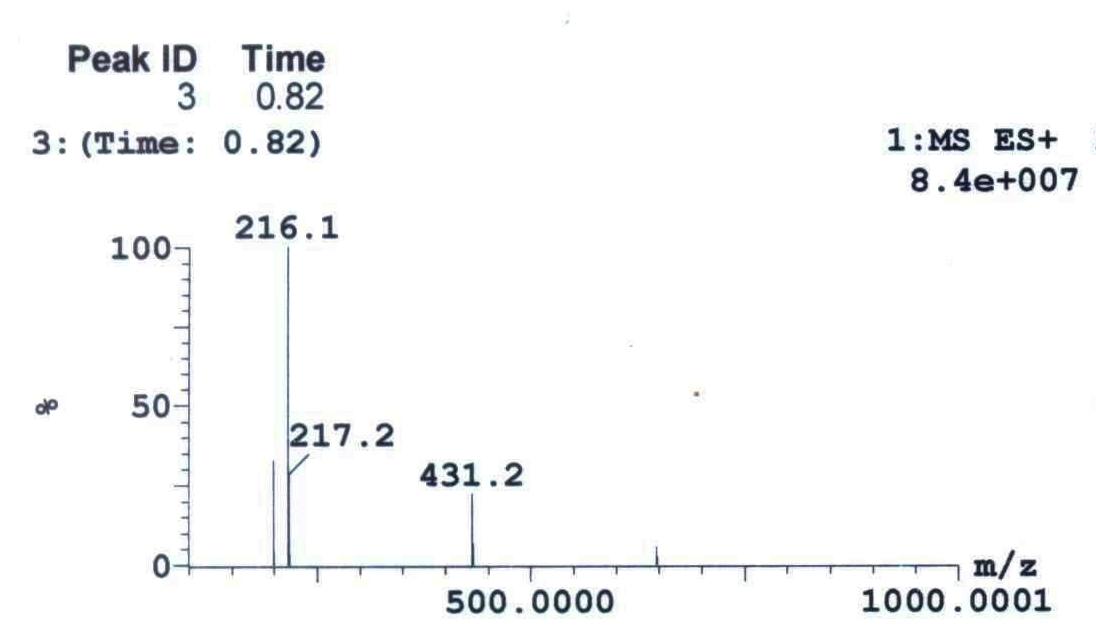


**1H, 13C NMR and UPLC-MS of (*E*)-3-(1-oxo-1*H*-isochromen-3-yl)acrylamide**


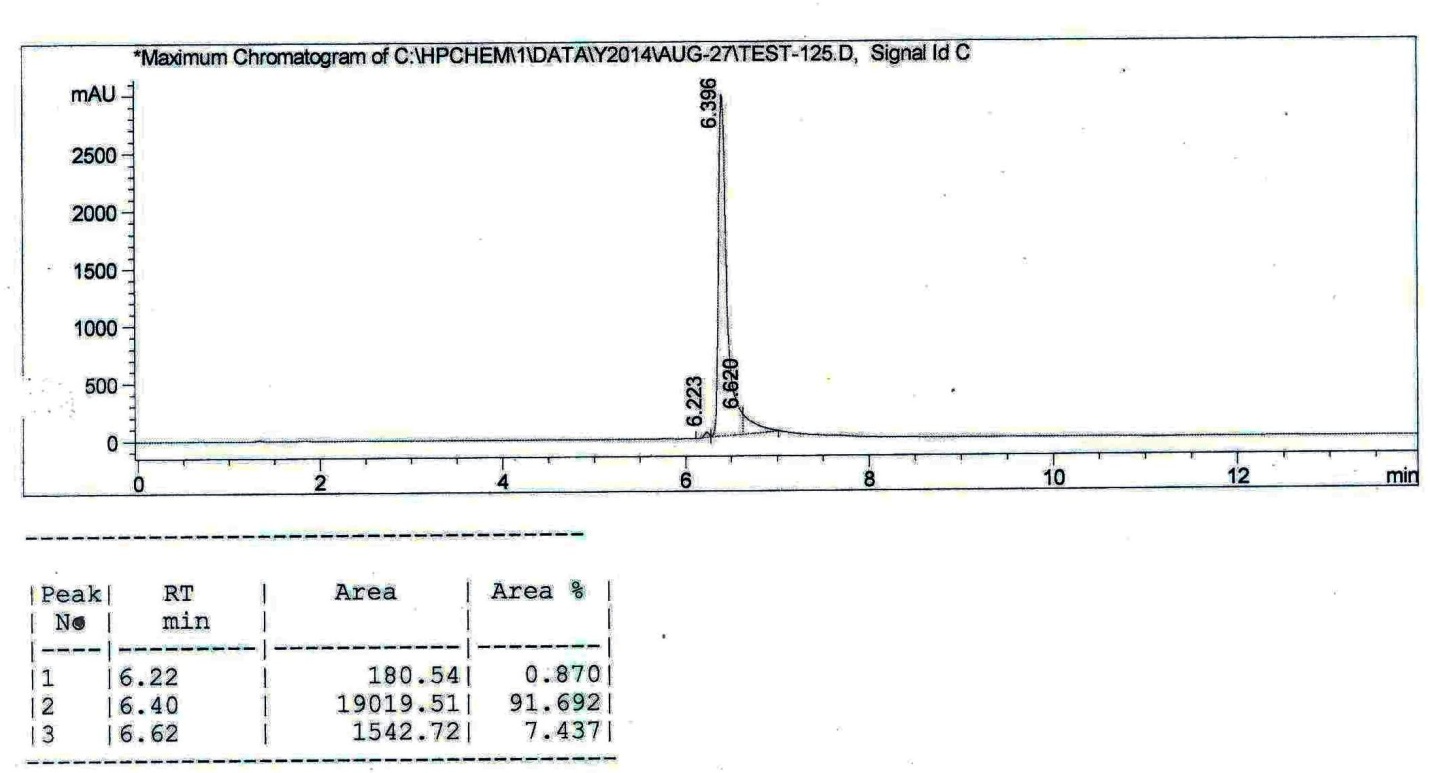


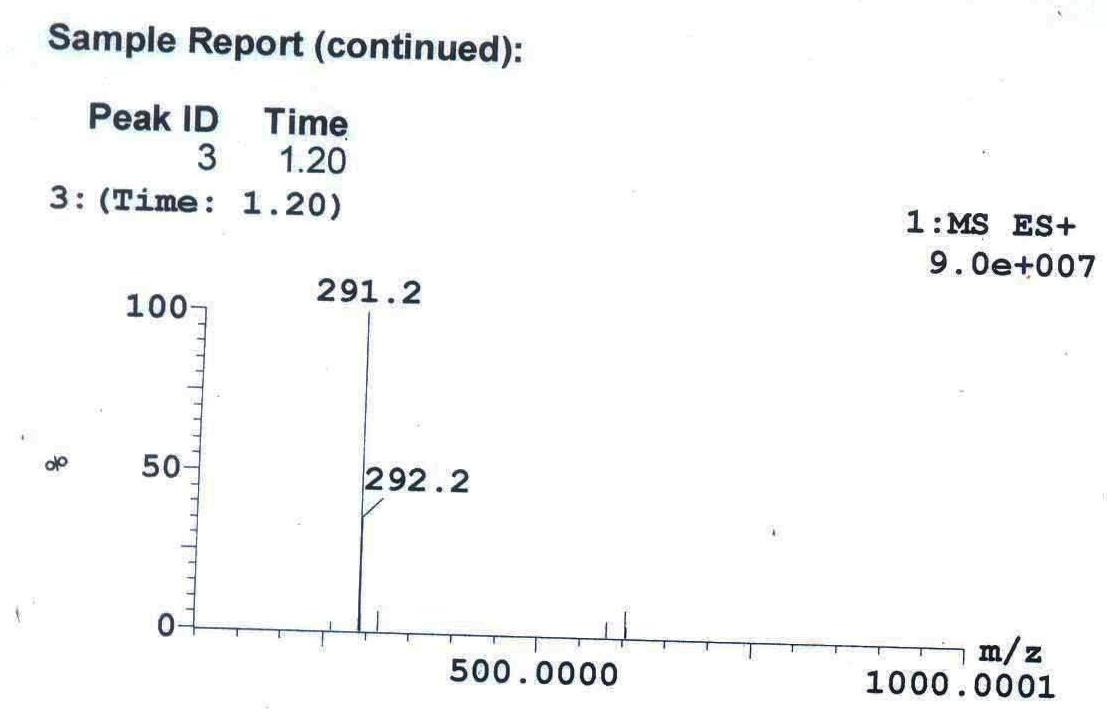


**1H, 13C NMR and UPLC-MS methyl (*E*)-3-(6,7-dimethoxy-1-oxo-1*H*-isochromen-3-yl)acrylate**

**2D NMR and DEPT methyl (*E*)-3-(6,7-dimethoxy-1-oxo-1*H*-isochromen-3-yl)acrylate**

| **Table 1S** Effect of calalyst load, solvent on the Heck coupling of **1a** and **3a** | | | | |
| --- | --- | --- | --- | --- |
| **S.**  **No.** | **Catalyst/mol%** | **Base** | **solvent** | **Yielda %** |
|  | Pd2dba3/10 | Et3N | 1,4-dioxane | 80 |
|  | Pd2dba3/10 | Cy2NMe | 1,4-dioxane | 87 |
|  | Pd2dba3/5 | Et3N | 1,4-dioxane | 91 |
|  | Pd2dba3/5 | Cy2NMe | 1,4-dioxane | 95 |
|  | Pd2dba3/5 | Cy2NMe | DMF | 79 |
|  | Pd2dba3/5 | Cy2NMe | THF | 84 |
|  | Pd2dba3/5 | Cy2NMe | Toluene | 72 |
|  | Pd2dba3/5 | Cy2NMe | Acetonitrile | 88 |
|  | Pd2dba3/2.5 | Et3N | 1,4-dioxane | 60 |
|  | Pd2dba3/2.5 | Cy2NMe | 1,4-dioxane | 80 |
|  | Pd2dba3/5 | Cy2NMe/1.0eq | 1,4-dioxane | 75 |
|  | Pd2dba3/5 | Cy2NMe/0.5eq | 1,4-dioxane | 65 |
|  | Pd2dba3/5 | Cy2NMe/2.0eq | 1,4-dioxane | 93 |
|  | **a**Reaction condition: **1** (1 mmol), **2** (1.5eq), Pd2dba3, P(t-Bu)3H.BF4 (20mol%), base (1.5eq) unless otherwise stated, 110 °C. | | | |

**Likewise, the 1H NMR spectrum of 3b , 3e and 3j exhibited signals for aromatic protons at δ 6.64-8.51 ppm, a pair of doublets of olefin protons at *δ* 6.40-6.64 and 7.20-7.67 (each *d*, *J* = 16.Hz & 7 Hz). The carbon-13 NMR spectrum of 3b, 3e and 3j howing the signals from 105.63- 166.93 ppm for aromatic region, which were connected in sequence in the 1H–1H COSY spectrum, suggesting the presence of 3-styryl-1*H*-isochromen-1-one. Its 13C NMR spectrum, which was assigned by DEPT 135 spectra of 3b, 3e and 3j showed CH carbons and quaternary carbons appeared in the range of *δ* 105.79-135.02. And did not show any methylene carbon signals. Additionally 3e, 3j showed two methoxy methyl (substituted at aromatic ring) protons singlets at *δ* 3.99 and 4.00, and at 55.99 -56.30 and 56.37-56.46 ppm for their corresponding carbons. Likewise, 3j showed acrylate methoxy methyl protons appearing as singlets at *δ* 3.81ppm 55.99-56.45 which belongs to three methoxy carbons, suggesting the presence of the 2*E*-acrylate group. The HSQC corrleates olefinic proton (H-1) to two carbon signals at *δ* 120 (C-1), 132 (C-2) and 56.30 and 56.37 of 6,7-dimethoxy carbon suggesting 3-substituted isocoumarin ring system. Further HSQC correlations from two olefinic protons of 3j at *δ* 6.6 and 7.2 to C-3 indicated the substitution of the acrylate group at C-3. The molecular formula, chemical shifts of 13C NMR spectrum indicated the 3-substituted isocumarin with (2*E*)-acrylate, for instance, (2E)-methyl 3-(6,7-dimethoxy-1-oxo-1*H*-isochromen-3-yl)acrylate.**

**3l: The compound 3l showed all the above aromatic characteristics in addition exhibited a multiplet of olefinic proton at *δ* 6.75 due to its adjacent two methylene protons and another methylene protons at *δ* 2.42-4.38, and showed peaks at 24.22-65.64. The carbons were connected in sequence in the 1H–1H COSY spectrum, suggesting the presence of *Endo*-cyclic olefine group. Its 13C NMR spectrum showed three methylene (CH2)carbon signals, which were assigned at 24.21, 63.80 and 65.65 by DEPT 135 and all CH carbons and quaternary carbons appeared in the range of *δ* 101.00-134.82. The HSQC interactions from an olefinic proton (H-1) to two carbon signals at *δ* 120.90 (C-1), 134.81 (C-2) of the olefin carbons and 24.04, 63.73 and 65.59 belongs to three methylene carbons of pyran ring suggested 3-substituted isocoumarin ring system.**
